# Supplementary material for: Proteomic Analysis of the Hemolymph After Metschnikowia bicuspidata Infection in the Chinese Mitten Crab Eriocheir sinensis
Source: Front Immunol. 2021 Apr 1;12:659723. doi: 10.3389/fimmu.2021.659723 (PMC8047416; doi:10.3389/fimmu.2021.659723)
Supplement: Supplementary file 2 [file Table_2.xlsx]

## Sheet: E_1 vs C_1
Protein accession	Protein description	Gene name	E_1/C_1 Ratio	E_1/C_1 P value	Regulated Type	MW [kDa]	Coverage [%]	Peptides	Unique peptides	C_1.1	C_1.2	C_1.4	E_1.1	E_1.2	E_1.4	Subcellular localization	KEGG KO No.	KEGG Gene	KEGG pathway	Biological Process	Cellular Component	Molecular Function	Pfam ID	Domain description	KOG category	KOG NO.	KOG description
TRINITY_DN10_c0_g3_m.452	Cystatin-A OS=Felis catus OX=9685 GN=CSTA PE=1 SV=1	CSTA	1.8689	0.0410246	Up	13.405	20	2	2	0.837153	0.752876	0.501374	1.64503	1.25812	1.00545	extracellular	K13907	CSTA_B; cystatin-A/B		GO:0006464 cellular protein modification process; GO:0006807 nitrogen compound metabolic process; GO:0007155 cell adhesion; GO:0007275 multicellular organism development; GO:0008152 metabolic process; GO:0008219 cell death; GO:0008544 epidermis development; GO:0009888 tissue development; GO:0009892 negative regulation of metabolic process; GO:0009913 epidermal cell differentiation; GO:0009987 cel…	GO:0001533 cornified envelope; GO:0005576 extracellular region; GO:0005615 extracellular space; GO:0005622 intracellular; GO:0005623 cell; GO:0005634 nucleus; GO:0005737 cytoplasm; GO:0005829 cytosol; GO:0005886 plasma membrane; GO:0016020 membrane; GO:0043226 organelle; GO:0043227 membrane-bounded organelle; GO:0043229 intracellular organelle; GO:0043231 intracellular membrane-bounded organelle;…	GO:0002020 protease binding; GO:0004857 enzyme inhibitor activity; GO:0004866 endopeptidase inhibitor activity; GO:0004869 cysteine-type endopeptidase inhibitor activity; GO:0005198 structural molecule activity; GO:0005488 binding; GO:0005515 protein binding; GO:0019899 enzyme binding; GO:0030234 enzyme regulator activity; GO:0030414 peptidase inhibitor activity; GO:0030674 protein-macromolecule …	PF00031	Cystatin domain
TRINITY_DN1001_c0_g1_m.15	Gelsolin, cytoplasmic OS=Homarus americanus OX=6706 PE=1 SV=1	--	2.0479	0.00268892	Up	82.257	48	26	26	0.737412	0.630988	0.600163	1.58221	1.18237	1.26686	cytoplasm	K05768	GSN; gelsolin	map04666 Fc gamma R-mediated phagocytosis; map04810 Regulation of actin cytoskeleton; map05203 Viral carcinogenesis				PF00626	Gelsolin repeat	Z	KOG0443	Actin regulatory proteins (gelsolin/villin family)
TRINITY_DN1028_c0_g2_m.131	60S ribosomal protein L10a OS=Spodoptera frugiperda OX=7108 GN=RpL10A PE=2 SV=1	RpL10A	1.7334	0.00542155	Up	24.739	24	4	4	0.720943	0.777348	0.69679	1.04272	1.3746	1.38761	cytoplasm	K02865	RP-L10Ae, RPL10A; large subunit ribosomal protein L10Ae	map03010 Ribosome	GO:0000470 maturation of LSU-rRNA; GO:0002181 cytoplasmic translation; GO:0006139 nucleobase-containing compound metabolic process; GO:0006364 rRNA processing; GO:0006396 RNA processing; GO:0006412 translation; GO:0006518 peptide metabolic process; GO:0006725 cellular aromatic compound metabolic process; GO:0006807 nitrogen compound metabolic process; GO:0008152 metabolic process; GO:0009058 bios…	GO:0005622 intracellular; GO:0005623 cell; GO:0005737 cytoplasm; GO:0005829 cytosol; GO:0005840 ribosome; GO:0015934 large ribosomal subunit; GO:0022625 cytosolic large ribosomal subunit; GO:0022626 cytosolic ribosome; GO:0032991 protein-containing complex; GO:0043226 organelle; GO:0043228 non-membrane-bounded organelle; GO:0043229 intracellular organelle; GO:0043232 intracellular non-membrane-bo…	GO:0003676 nucleic acid binding; GO:0003723 RNA binding; GO:0003735 structural constituent of ribosome; GO:0005198 structural molecule activity; GO:0005488 binding; GO:0097159 organic cyclic compound binding; GO:1901363 heterocyclic compound binding;	PF00687	Ribosomal protein L1p/L10e family	J	KOG1570	60S ribosomal protein L10A
TRINITY_DN1047_c0_g1_m.222	Synaptic vesicle membrane protein VAT-1 homolog-like OS=Mus musculus OX=10090 GN=Vat1l PE=1 SV=2	Vat1l	0.3366	0.00249207	Down	48.198	23.5	7	7	1.36398	1.18866	1.9362	0.454592	0.564238	0.492333	cytoplasm,nucleus							PF08240; PF13602	Alcohol dehydrogenase GroES-like domain; Zinc-binding dehydrogenase	C	KOG1198	Zinc-binding oxidoreductase
TRINITY_DN10547_c0_g1_m.243	Anti-lipopolysaccharide factor OS=Portunus trituberculatus OX=210409 GN=ALF PE=2 SV=2	ALF	0.5259	0.0122179	Down	17.293	38.3	6	6	1.54406	1.11293	1.27519	0.844545	0.651861	0.571413	plasma membrane
TRINITY_DN106_c1_g2_m.316	Annexin A11 OS=Homo sapiens OX=9606 GN=ANXA11 PE=1 SV=1	ANXA11	0.517	0.00501675	Down	56.634	15.1	7	7	1.54688	1.24157	1.1666	0.610584	0.640075	0.794289	cytoplasm	K17095	ANXA7_11; annexin A7/11		GO:0006139 nucleobase-containing compound metabolic process; GO:0006351 transcription, DNA-templated; GO:0006355 regulation of transcription, DNA-templated; GO:0006357 regulation of transcription by RNA polymerase II; GO:0006725 cellular aromatic compound metabolic process; GO:0006807 nitrogen compound metabolic process; GO:0008152 metabolic process; GO:0009058 biosynthetic process; GO:0009059 ma…		GO:0003779 actin binding; GO:0005488 binding; GO:0005515 protein binding; GO:0005543 phospholipid binding; GO:0005544 calcium-dependent phospholipid binding; GO:0008092 cytoskeletal protein binding; GO:0008289 lipid binding; GO:0043167 ion binding; GO:0043168 anion binding;			U	KOG0819	Annexin
TRINITY_DN107_c0_g2_m.357	Calcium-transporting ATPase sarcoplasmic/endoplasmic reticulum type OS=Anopheles gambiae OX=7165 GN=Ca-P60A PE=3 SV=5	Ca-P60A	3.2067	0.00255103	Up	82.674	11.2	6	3	0.503526	0.457958	0.63199		1.65848	1.74804	plasma membrane	K05853	ATP2A; P-type Ca2+ transporter type 2A [EC:7.2.2.10]	map04020 Calcium signaling pathway; map04022 cGMP-PKG signaling pathway; map04024 cAMP signaling pathway; map04260 Cardiac muscle contraction; map04261 Adrenergic signaling in cardiomyocytes; map04919 Thyroid hormone signaling pathway; map04972 Pancreatic secretion; map05010 Alzheimer disease; map05410 Hypertrophic cardiomyopathy (HCM); map05412 Arrhythmogenic right ventricular cardiomyopathy (AR…	GO:0000003 reproduction; GO:0002064 epithelial cell development; GO:0002065 columnar/cuboidal epithelial cell differentiation; GO:0002066 columnar/cuboidal epithelial cell development; GO:0003006 developmental process involved in reproduction; GO:0003008 system process; GO:0003013 circulatory system process; GO:0003015 heart process; GO:0006082 organic acid metabolic process; GO:0006629 lipid met…	GO:0005622 intracellular; GO:0005623 cell; GO:0005737 cytoplasm; GO:0005783 endoplasmic reticulum; GO:0005789 endoplasmic reticulum membrane; GO:0012505 endomembrane system; GO:0016020 membrane; GO:0016528 sarcoplasm; GO:0016529 sarcoplasmic reticulum; GO:0031984 organelle subcompartment; GO:0042175 nuclear outer membrane-endoplasmic reticulum membrane network; GO:0043226 organelle; GO:0043227 me…	GO:0003824 catalytic activity; GO:0005215 transporter activity; GO:0005388 calcium transmembrane transporter activity, phosphorylative mechanism; GO:0005488 binding; GO:0005515 protein binding; GO:0008324 cation transmembrane transporter activity; GO:0015075 ion transmembrane transporter activity; GO:0015085 calcium ion transmembrane transporter activity; GO:0015318 inorganic molecular entity tra…	PF00702	haloacid dehalogenase-like hydrolase	P	KOG0202	Ca2+ transporting ATPase
TRINITY_DN1110_c0_g1_m.508	RNA-binding protein Nova-1 OS=Macaca fascicularis OX=9541 GN=NOVA1 PE=2 SV=1	NOVA1	1.547	0.0327534	Up	60.348	12.6	5	5	0.692489	0.823375	0.945599	1.30184	1.2367		cytoplasm,nucleus	K14944	NOVA; RNA-binding protein Nova		GO:0000375 RNA splicing, via transesterification reactions; GO:0000377 RNA splicing, via transesterification reactions with bulged adenosine as nucleophile; GO:0000381 regulation of alternative mRNA splicing, via spliceosome; GO:0000398 mRNA splicing, via spliceosome; GO:0006139 nucleobase-containing compound metabolic process; GO:0006396 RNA processing; GO:0006397 mRNA processing; GO:0006725 cel…	GO:0005622 intracellular; GO:0005623 cell; GO:0005634 nucleus; GO:0043226 organelle; GO:0043227 membrane-bounded organelle; GO:0043229 intracellular organelle; GO:0043231 intracellular membrane-bounded organelle;	GO:0003676 nucleic acid binding; GO:0003723 RNA binding; GO:0003729 mRNA binding; GO:0005488 binding; GO:0097159 organic cyclic compound binding; GO:1901363 heterocyclic compound binding;	PF00013	KH domain	A	KOG2191	RNA-binding protein NOVA1/PASILLA and related KH domain proteins
TRINITY_DN13_c0_g1_m.1679	Alpha-N-acetylgalactosamine-specific lectin OS=Patiria pectinifera OX=7594 PE=1 SV=1	--	0.3086	0.0127538	Down	24.397	25.9	5	5	2.00501	1.20369	1.37629	0.496704	0.285583	0.632724	plasma membrane	K06468	FCER2, CD23; low affinity immunoglobulin epsilon Fc receptor	map04640 Hematopoietic cell lineage; map05169 Epstein-Barr virus infection				PF00059	Lectin C-type domain	TV	KOG4297	C-type lectin
TRINITY_DN1355_c0_g1_m.1522	Purine nucleoside phosphorylase OS=Bos taurus OX=9913 GN=PNP PE=1 SV=3	PNP	1.9057	0.00150734	Up	39.611	16.2	4	4	0.791394	0.624301	0.649181	1.2718	1.41898	1.24435	cytoskeleton	K03783	punA, PNP; purine-nucleoside phosphorylase [EC:2.4.2.1]	map00230 Purine metabolism; map00240 Pyrimidine metabolism; map00760 Nicotinate and nicotinamide metabolism; map01100 Metabolic pathways				PF01048	Phosphorylase superfamily	F	KOG3984	Purine nucleoside phosphorylase
TRINITY_DN1382_c1_g3_m.1620	Myosin regulatory light chain 2 OS=Bombyx mori OX=7091 PE=1 SV=1	--	2.6698	0.0367414	Up	20.703	18.1	3	3	0.551551	0.447515		1.23372	0.935356	1.83185	mitochondria				GO:0003008 system process; GO:0003012 muscle system process; GO:0006996 organelle organization; GO:0007010 cytoskeleton organization; GO:0009653 anatomical structure morphogenesis; GO:0009987 cellular process; GO:0010927 cellular component assembly involved in morphogenesis; GO:0016043 cellular component organization; GO:0022607 cellular component assembly; GO:0030029 actin filament-based process…	GO:0005622 intracellular; GO:0005623 cell; GO:0005737 cytoplasm; GO:0005856 cytoskeleton; GO:0015629 actin cytoskeleton; GO:0016459 myosin complex; GO:0030016 myofibril; GO:0032991 protein-containing complex; GO:0043226 organelle; GO:0043228 non-membrane-bounded organelle; GO:0043229 intracellular organelle; GO:0043232 intracellular non-membrane-bounded organelle; GO:0043292 contractile fiber; GO…				Z	KOG0031	Myosin regulatory light chain, EF-Hand protein superfamily
TRINITY_DN14_c0_g1_m.2067	Venom toxin OcyC11 OS=Opisthacanthus cayaporum OX=573324 PE=1 SV=1	--	0.6644	0.0132919	Down	13.142	35.5	4	4	1.09726	1.19536	1.31238	0.932181	0.710242	0.752572	extracellular
TRINITY_DN1511_c0_g1_m.2141	Ficolin-1 OS=Homo sapiens OX=9606 GN=FCN1 PE=1 SV=2	FCN1	0.2077	0.000460492	Down	34.763	46.3	13	13	1.52807	1.51953	1.92051	0.309332	0.435997	0.286569	extracellular	K10104	FCN; ficolin					PF00147	Fibrinogen beta and gamma chains, C-terminal globular domain	S	KOG2579	Ficolin and related extracellular proteins
TRINITY_DN1537_c1_g1_m.2248	Low-density lipoprotein receptor OS=Mus musculus OX=10090 GN=Ldlr PE=1 SV=2	Ldlr	3.2765	0.00505469	Up	94.852	20.1	11	11	0.50806	0.365129	0.529838	2.03661	1.44071	1.11965	plasma membrane	K20053	VLDLR; very low-density lipoprotein receptor		GO:0006810 transport; GO:0006897 endocytosis; GO:0006898 receptor-mediated endocytosis; GO:0016192 vesicle-mediated transport; GO:0032368 regulation of lipid transport; GO:0032370 positive regulation of lipid transport; GO:0032879 regulation of localization; GO:0048518 positive regulation of biological process; GO:0050789 regulation of biological process; GO:0051049 regulation of transport; GO:00…	GO:0005623 cell; GO:0005886 plasma membrane; GO:0016020 membrane; GO:0071944 cell periphery;	GO:0005488 binding; GO:0038024 cargo receptor activity; GO:0044877 protein-containing complex binding; GO:0071813 lipoprotein particle binding; GO:0071814 protein-lipid complex binding;	PF07645	Calcium-binding EGF domain	T	KOG1215	Low-density lipoprotein receptors containing Ca2+-binding EGF-like domains
TRINITY_DN16_c0_g2_m.2902	PDGF/VEGF-related factor [Eriocheir sinensis]	--	0.392	0.00340923	Down	22.258	15.1	2	2	1.36395	1.11746	1.48255		0.528202	0.507837	extracellular				GO:0000003 reproduction; GO:0001655 urogenital system development; GO:0001667 ameboidal-type cell migration; GO:0001932 regulation of protein phosphorylation; GO:0001934 positive regulation of protein phosphorylation; GO:0002009 morphogenesis of an epithelium; GO:0002064 epithelial cell development; GO:0002065 columnar/cuboidal epithelial cell differentiation; GO:0002066 columnar/cuboidal epithel…	GO:0005576 extracellular region; GO:0005615 extracellular space; GO:0005622 intracellular; GO:0005623 cell; GO:0005737 cytoplasm;	GO:0005102 signaling receptor binding; GO:0005126 cytokine receptor binding; GO:0005172 vascular endothelial growth factor receptor binding; GO:0005488 binding; GO:0005515 protein binding; GO:0005539 glycosaminoglycan binding; GO:0008201 heparin binding; GO:0043167 ion binding; GO:0043168 anion binding; GO:0070851 growth factor receptor binding; GO:0097367 carbohydrate derivative binding; GO:1901…
TRINITY_DN1677_c0_g1_m.2815	hypothetical protein	--	2.0979	0.0303424	Up	13.674	17.1	2	2	0.927305	0.580104	0.429397	1.35595	1.5468	1.16045	extracellular
TRINITY_DN1708_c2_g1_m.2937	Putative uncharacterized oxidoreductase C513.07 OS=Schizosaccharomyces pombe (strain 972 / ATCC 24843) OX=284812 GN=SPAC513.07 PE=3 SV=1	SPAC513.07	0.6154	0.00158104	Down	48.775	34.5	10	10	1.38408	1.14267	1.18747	0.764244	0.729471	0.792068	cytoplasm				GO:0007498 mesoderm development; GO:0009888 tissue development; GO:0032502 developmental process; GO:0048856 anatomical structure development;					I	KOG1502	Flavonol reductase/cinnamoyl-CoA reductase
TRINITY_DN1758_c0_g1_m.3101	Stress-induced-phosphoprotein 1 OS=Bos taurus OX=9913 GN=STIP1 PE=2 SV=1	STIP1	0.6411	0.0335643	Down	68.41	9.8	4	4	1.52787	1.02176	1.10645	0.83816	0.811151	0.694603	mitochondria	K09553	STIP1; stress-induced-phosphoprotein 1	map05020 Prion diseases						O	KOG0548	Molecular co-chaperone STI1
TRINITY_DN180_c0_g1_m.3275	uncharacterized protein LOC113820575 [Penaeus vannamei]	--	1.6533	0.036516	Up	15.158	40.1	5	5	0.746307	0.631013	0.884032	1.31913	1.4626	0.956925	extracellular
TRINITY_DN182_c0_g1_m.3315	Myosin light chain alkali OS=Drosophila virilis OX=7244 GN=Mlc1 PE=4 SV=1	Mlc1	2.1011	0.00823764	Up	17.613	26	3	3	0.623219	0.706238	0.605327	1.06577	1.27162	1.72782	cytoplasm				GO:0003008 system process; GO:0003012 muscle system process; GO:0006936 muscle contraction; GO:0007498 mesoderm development; GO:0009888 tissue development; GO:0032501 multicellular organismal process; GO:0032502 developmental process; GO:0048856 anatomical structure development;	GO:0005622 intracellular; GO:0005623 cell; GO:0005737 cytoplasm; GO:0005856 cytoskeleton; GO:0005859 muscle myosin complex; GO:0015629 actin cytoskeleton; GO:0016459 myosin complex; GO:0016460 myosin II complex; GO:0032991 protein-containing complex; GO:0043226 organelle; GO:0043228 non-membrane-bounded organelle; GO:0043229 intracellular organelle; GO:0043232 intracellular non-membrane-bounded o…	GO:0000146 microfilament motor activity; GO:0003774 motor activity; GO:0003824 catalytic activity; GO:0016462 pyrophosphatase activity; GO:0016787 hydrolase activity; GO:0016817 hydrolase activity, acting on acid anhydrides; GO:0016818 hydrolase activity, acting on acid anhydrides, in phosphorus-containing anhydrides; GO:0017111 nucleoside-triphosphatase activity;			Z	KOG0030	Myosin essential light chain, EF-Hand protein superfamily
TRINITY_DN187_c0_g1_m.3442	Tubulin alpha-2 chain OS=Homarus americanus OX=6706 PE=2 SV=1	--	2.1529	0.000265648	Up	50.079	33.4	11	6	0.684682	0.650502	0.717965		1.45443	1.49243	cytoskeleton	K07374	TUBA; tubulin alpha	map04145 Phagosome; map04210 Apoptosis; map04530 Tight junction; map04540 Gap junction; map05130 Pathogenic Escherichia coli infection		GO:0005622 intracellular; GO:0005623 cell; GO:0005856 cytoskeleton; GO:0043226 organelle; GO:0043228 non-membrane-bounded organelle; GO:0043229 intracellular organelle; GO:0043232 intracellular non-membrane-bounded organelle;		PF00091; PF03953	Tubulin/FtsZ family, GTPase domain; Tubulin C-terminal domain	Z	KOG1376	Alpha tubulin
TRINITY_DN195_c4_g3_m.3711	Integrin-linked protein kinase homolog pat-4 OS=Caenorhabditis elegans OX=6239 GN=pat-4 PE=1 SV=1	pat-4	0.6222	0.00380318	Down	50.556	12.5	4	4	1.34204	1.05494	1.30166	0.75021	0.756478	0.79467	cytoplasm	K06272	ILK; integrin-linked kinase [EC:2.7.11.1]	map03320 PPAR signaling pathway; map04360 Axon guidance; map04510 Focal adhesion; map05100 Bacterial invasion of epithelial cells; map05131 Shigellosis; map05213 Endometrial cancer	GO:0000902 cell morphogenesis; GO:0000904 cell morphogenesis involved in differentiation; GO:0002009 morphogenesis of an epithelium; GO:0002165 instar larval or pupal development; GO:0006464 cellular protein modification process; GO:0006468 protein phosphorylation; GO:0006793 phosphorus metabolic process; GO:0006796 phosphate-containing compound metabolic process; GO:0006807 nitrogen compound met…	GO:0005622 intracellular; GO:0005623 cell; GO:0005737 cytoplasm; GO:0005912 adherens junction; GO:0005925 focal adhesion; GO:0030054 cell junction; GO:0030055 cell-substrate junction; GO:0070161 anchoring junction;	GO:0003824 catalytic activity; GO:0004672 protein kinase activity; GO:0005488 binding; GO:0005515 protein binding; GO:0016301 kinase activity; GO:0016740 transferase activity; GO:0016772 transferase activity, transferring phosphorus-containing groups; GO:0016773 phosphotransferase activity, alcohol group as acceptor; GO:0140096 catalytic activity, acting on a protein;	PF07714	Protein tyrosine kinase	T	KOG0195	Integrin-linked kinase
TRINITY_DN2028_c0_g1_m.3918	PREDICTED: uncharacterized protein LOC107068554 [Polistes dominula]	--	1.5396	0.0494673	Up	95.763	63.6	43	43	0.732478	0.714534	0.915612	1.19316	1.49067	0.953552	extracellular							PF01607	Chitin binding Peritrophin-A domain	T	KOG0032	Ca2+/calmodulin-dependent protein kinase, EF-Hand protein superfamily
TRINITY_DN2049_c0_g1_m.3988	Uncharacterized peptidase C1-like protein F26E4.3 OS=Caenorhabditis elegans OX=6239 GN=F26E4.3 PE=1 SV=3	F26E4.3	0.195	0.000534754	Down	54.892	29.3	12	12	1.37171	1.60985	2.03946	0.291184	0.284245	0.403551	mitochondria				GO:0007155 cell adhesion; GO:0008104 protein localization; GO:0009966 regulation of signal transduction; GO:0009967 positive regulation of signal transduction; GO:0010646 regulation of cell communication; GO:0010647 positive regulation of cell communication; GO:0022610 biological adhesion; GO:0023051 regulation of signaling; GO:0023056 positive regulation of signaling; GO:0030111 regulation of Wn…	GO:0005576 extracellular region; GO:0005615 extracellular space; GO:0005623 cell; GO:0030312 external encapsulating structure; GO:0042600 egg chorion; GO:0071944 cell periphery;	GO:0005488 binding; GO:0005515 protein binding; GO:0017147 Wnt-protein binding;	PF00112	Papain family cysteine protease	S	KOG1544	Predicted cysteine proteinase TIN-ag
TRINITY_DN215_c0_g1_m.4297	Tubulin beta-1 chain OS=Homarus americanus OX=6706 PE=2 SV=1	--	1.5009	0.0456356	Up	50.778	65.6	21	7	0.905508	0.762901	0.730709	1.00361	1.09881	1.49846	cytoplasm	K07375	TUBB; tubulin beta	map04145 Phagosome; map04540 Gap junction; map05130 Pathogenic Escherichia coli infection				PF00091; PF03953	Tubulin/FtsZ family, GTPase domain; Tubulin C-terminal domain	Z	KOG1375	Beta tubulin
TRINITY_DN21871_c0_g1_m.4382	Heat shock cognate 70 kDa protein OS=Oncorhynchus mykiss OX=8022 GN=hsc71 PE=2 SV=2	hsc71	1.7352	0.0113687	Up	71.272	32.6	15	14	0.860171	0.655642	0.677807	1.05212	1.39516	1.3591	cytoplasm	K03283	HSPA1s; heat shock 70kDa protein 1/2/6/8	map03040 Spliceosome; map04010 MAPK signaling pathway; map04141 Protein processing in endoplasmic reticulum; map04144 Endocytosis; map04213 Longevity regulating pathway - multiple species; map04612 Antigen processing and presentation; map04915 Estrogen signaling pathway; map05134 Legionellosis; map05145 Toxoplasmosis; map05162 Measles						O	KOG0101	Molecular chaperones HSP70/HSC70, HSP70 superfamily
TRINITY_DN2200_c0_g1_m.4428	L-ascorbate oxidase OS=Cucurbita pepo var. melopepo OX=3665 PE=1 SV=1	--	5.7885	0.00782827	Up	73.599	49.6	20	20	0.337203	0.422753	0.123889	1.80378	1.76372	1.54866	extracellular				GO:0000041 transition metal ion transport; GO:0006810 transport; GO:0006811 ion transport; GO:0006812 cation transport; GO:0006826 iron ion transport; GO:0006873 cellular ion homeostasis; GO:0006875 cellular metal ion homeostasis; GO:0006879 cellular iron ion homeostasis; GO:0008152 metabolic process; GO:0009987 cellular process; GO:0019725 cellular homeostasis; GO:0030001 metal ion transport; GO…	GO:0005623 cell; GO:0005886 plasma membrane; GO:0005887 integral component of plasma membrane; GO:0009897 external side of plasma membrane; GO:0009986 cell surface; GO:0016020 membrane; GO:0016021 integral component of membrane; GO:0031224 intrinsic component of membrane; GO:0031226 intrinsic component of plasma membrane; GO:0031233 intrinsic component of external side of plasma membrane; GO:0032…	GO:0003824 catalytic activity; GO:0004322 ferroxidase activity; GO:0016491 oxidoreductase activity; GO:0016722 oxidoreductase activity, oxidizing metal ions; GO:0016724 oxidoreductase activity, oxidizing metal ions, oxygen as acceptor;	PF07732; PF00394; PF07731	Multicopper oxidase; Multicopper oxidase; Multicopper oxidase	Q	KOG1263	Multicopper oxidases
TRINITY_DN2249_c0_g1_m.4605	Neurotrypsin OS=Pan troglodytes OX=9598 GN=PRSS12 PE=3 SV=1	PRSS12	1.5101	0.0283671	Up	95.517	55.9	37	37	0.798157	0.923087	0.669059	1.2908	1.30222	1.01668	mitochondria	K23489	SVH1, Teq; HGF/MSP/plasminogen-like protein	map04361 Axon regeneration				PF00051; PF00024; PF00530; PF00089	Kringle domain; PAN domain; Scavenger receptor cysteine-rich domain; Trypsin	O	KOG3627	Trypsin
TRINITY_DN23760_c0_g1_m.4926	Glyceraldehyde-3-phosphate dehydrogenase OS=Panulirus versicolor OX=150436 PE=1 SV=1	--	1.5422	0.0335794	Up	37.494	64.3	17	17	0.629242	0.887589	0.843292	1.09265	1.11785	1.42937	cytoplasm	K00134	GAPDH, gapA; glyceraldehyde 3-phosphate dehydrogenase [EC:1.2.1.12]	map00010 Glycolysis / Gluconeogenesis; map01100 Metabolic pathways; map01200 Carbon metabolism; map01230 Biosynthesis of amino acids; map04066 HIF-1 signaling pathway; map05010 Alzheimer disease; map05130 Pathogenic Escherichia coli infection				PF00044; PF02800	Glyceraldehyde 3-phosphate dehydrogenase, NAD binding domain; Glyceraldehyde 3-phosphate dehydrogenase, C-terminal domain	G	KOG0657	Glyceraldehyde 3-phosphate dehydrogenase
TRINITY_DN23967_c0_g1_m.5025	Histone H2A.V (Fragment) OS=Strongylocentrotus purpuratus OX=7668 GN=H2A.F/Z PE=1 SV=1	H2A.F/Z	1.5853	0.0114871	Up	13.934	29.9	4	4	0.832174	0.86461	0.624018	1.16229	1.26638	1.25053	nucleus	K11251	H2A; histone H2A	map04217 Necroptosis; map05034 Alcoholism; map05322 Systemic lupus erythematosus	GO:0006325 chromatin organization; GO:0006342 chromatin silencing; GO:0006355 regulation of transcription, DNA-templated; GO:0006996 organelle organization; GO:0008104 protein localization; GO:0009889 regulation of biosynthetic process; GO:0009890 negative regulation of biosynthetic process; GO:0009892 negative regulation of metabolic process; GO:0009987 cellular process; GO:0010468 regulation of…	GO:0000228 nuclear chromosome; GO:0000785 chromatin; GO:0000786 nucleosome; GO:0000790 nuclear chromatin; GO:0005622 intracellular; GO:0005623 cell; GO:0005634 nucleus; GO:0005694 chromosome; GO:0005700 polytene chromosome; GO:0005701 polytene chromosome chromocenter; GO:0010369 chromocenter; GO:0031974 membrane-enclosed lumen; GO:0031981 nuclear lumen; GO:0032991 protein-containing complex; GO:0…	GO:0003676 nucleic acid binding; GO:0003677 DNA binding; GO:0005488 binding; GO:0097159 organic cyclic compound binding; GO:1901363 heterocyclic compound binding;	PF00125	Core histone H2A/H2B/H3/H4	B	KOG1757	Histone 2A
TRINITY_DN2444_c0_g1_m.5202	hypothetical protein	--	17.1507	0.0227183	Up	20.277	54.5	7	7	0.05492	0.267386	0.00826	1.76676	2.22915	1.67352	extracellular
TRINITY_DN2444_c0_g2_m.5205	hypothetical protein	--	16.3429	0.00555488	Up	19.766	64.6	8	8	0.086455	0.226567	0.032941	2.26109	1.74968	1.64327	extracellular
TRINITY_DN2465_c1_g1_m.5252	Prosaposin OS=Bos taurus OX=9913 GN=PSAP PE=1 SV=3	PSAP	1.5803	0.0187555	Up	102.44	13.3	7	7	0.649324	0.90714	0.768841	1.0872	1.19303	1.39446	extracellular	K12382	PSAP, SGP1; saposin	map04142 Lysosome	GO:0006403 RNA localization; GO:0006629 lipid metabolic process; GO:0006643 membrane lipid metabolic process; GO:0006665 sphingolipid metabolic process; GO:0006807 nitrogen compound metabolic process; GO:0006810 transport; GO:0008152 metabolic process; GO:0009987 cellular process; GO:0015931 nucleobase-containing compound transport; GO:0033036 macromolecule localization; GO:0033227 dsRNA transpor…	GO:0000323 lytic vacuole; GO:0005622 intracellular; GO:0005623 cell; GO:0005737 cytoplasm; GO:0005764 lysosome; GO:0005768 endosome; GO:0005770 late endosome; GO:0005773 vacuole; GO:0005776 autophagosome; GO:0012505 endomembrane system; GO:0031410 cytoplasmic vesicle; GO:0031982 vesicle; GO:0043226 organelle; GO:0043227 membrane-bounded organelle; GO:0043229 intracellular organelle; GO:0043231 in…	GO:0001664 G protein-coupled receptor binding; GO:0005102 signaling receptor binding; GO:0005488 binding; GO:0005515 protein binding; GO:0008047 enzyme activator activity; GO:0030234 enzyme regulator activity; GO:0098772 molecular function regulator;	PF05184	Saposin-like type B, region 1	GI	KOG1340	Prosaposin
TRINITY_DN2505_c0_g1_m.5359	PREDICTED: uncharacterized protein LOC108677184 [Hyalella azteca]	--	0.3864	0.00385859	Down	57.258	36.8	18	18	1.37363	1.4435	1.51066	0.603597	0.397571	0.671043	extracellular
TRINITY_DN2539_c0_g1_m.5462	Transferrin OS=Blaberus discoidalis OX=6981 PE=1 SV=1	--	3.0141	0.0169138	Up	85.888	63.6	44	44	0.547987	0.680014	0.266723	1.70875	1.53246	1.26407	plasma membrane	K06569	MFI2, CD228; melanoma-associated antigen p97		GO:0007610 behavior; GO:0007635 chemosensory behavior; GO:0009605 response to external stimulus; GO:0009607 response to biotic stimulus; GO:0009620 response to fungus; GO:0042048 olfactory behavior; GO:0042221 response to chemical; GO:0043207 response to external biotic stimulus; GO:0050896 response to stimulus; GO:0051704 multi-organism process; GO:0051707 response to other organism;			PF00405	Transferrin
TRINITY_DN2787_c0_g1_m.6005	C-type lectin lectoxin-Enh6 OS=Pseudoferania polylepis OX=338839 PE=2 SV=1	--	1.9349	0.0296306	Up	28.732	69.2	9	9	0.560391	0.931809	0.552183	1.55302	1.34352	1.05908	cytoplasm						GO:0005488 binding; GO:0030246 carbohydrate binding;	PF00059	Lectin C-type domain	TV	KOG4297	C-type lectin
TRINITY_DN284_c1_g1_m.6137	Four and a half LIM domains protein 2 OS=Bos taurus OX=9913 GN=FHL2 PE=2 SV=1	FHL2	1.9723	0.00250776	Up	64.862	24	10	10	0.592206	0.802659	0.623745	1.32608	1.41726	1.23805	nucleus	K14380	FHL2; four and a half LIM domains protein 2	map04380 Osteoclast differentiation				PF06297; PF00412	PET Domain; LIM domain	TZ	KOG1704	FOG: LIM domain
TRINITY_DN284_c3_g3_m.6143	Serine protease inhibitor 42Dd OS=Drosophila melanogaster OX=7227 GN=Spn42Dd PE=2 SV=1	Spn42Dd	4.1181	0.0492671	Up	47.823	19	6	6	0.393005	0.396243	0.383072	2.83778	1.37406	0.615837	extracellular	K23425	SERPINB1; leukocyte elastase inhibitor		GO:0001775 cell activation; GO:0002252 immune effector process; GO:0002263 cell activation involved in immune response; GO:0002274 myeloid leukocyte activation; GO:0002275 myeloid cell activation involved in immune response; GO:0002283 neutrophil activation involved in immune response; GO:0002366 leukocyte activation involved in immune response; GO:0002376 immune system process; GO:0002443 leukoc…	GO:0005576 extracellular region; GO:0005615 extracellular space; GO:0005622 intracellular; GO:0005623 cell; GO:0005737 cytoplasm; GO:0012505 endomembrane system; GO:0030141 secretory granule; GO:0031410 cytoplasmic vesicle; GO:0031974 membrane-enclosed lumen; GO:0031982 vesicle; GO:0031983 vesicle lumen; GO:0034774 secretory granule lumen; GO:0043226 organelle; GO:0043227 membrane-bounded organel…	GO:0004857 enzyme inhibitor activity; GO:0004866 endopeptidase inhibitor activity; GO:0004867 serine-type endopeptidase inhibitor activity; GO:0030234 enzyme regulator activity; GO:0030414 peptidase inhibitor activity; GO:0061134 peptidase regulator activity; GO:0061135 endopeptidase regulator activity; GO:0098772 molecular function regulator;	PF00079	Serpin (serine protease inhibitor)	V	KOG2392	Serpin
TRINITY_DN30294_c0_g1_m.6623	Phosphoglycerate kinase OS=Drosophila melanogaster OX=7227 GN=Pgk PE=2 SV=2	Pgk	0.3344	0.0490194	Down	48.129	27.3	9	9	0.677636	1.96729	1.85139	0.417506	0.513924	0.572251	mitochondria	K00927	PGK, pgk; phosphoglycerate kinase [EC:2.7.2.3]	map00010 Glycolysis / Gluconeogenesis; map01100 Metabolic pathways; map01200 Carbon metabolism; map01230 Biosynthesis of amino acids; map04066 HIF-1 signaling pathway	GO:0000768 syncytium formation by plasma membrane fusion; GO:0005975 carbohydrate metabolic process; GO:0006082 organic acid metabolic process; GO:0006090 pyruvate metabolic process; GO:0006091 generation of precursor metabolites and energy; GO:0006096 glycolytic process; GO:0006139 nucleobase-containing compound metabolic process; GO:0006163 purine nucleotide metabolic process; GO:0006164 purine…	GO:0005622 intracellular; GO:0005623 cell; GO:0005737 cytoplasm; GO:0030016 myofibril; GO:0030017 sarcomere; GO:0030018 Z disc; GO:0031430 M band; GO:0031672 A band; GO:0031674 I band; GO:0043226 organelle; GO:0043228 non-membrane-bounded organelle; GO:0043229 intracellular organelle; GO:0043232 intracellular non-membrane-bounded organelle; GO:0043292 contractile fiber; GO:0099080 supramolecular …	GO:0000166 nucleotide binding; GO:0003824 catalytic activity; GO:0004618 phosphoglycerate kinase activity; GO:0005488 binding; GO:0005524 ATP binding; GO:0008144 drug binding; GO:0016301 kinase activity; GO:0016740 transferase activity; GO:0016772 transferase activity, transferring phosphorus-containing groups; GO:0016774 phosphotransferase activity, carboxyl group as acceptor; GO:0017076 purine …	PF00162	Phosphoglycerate kinase	G	KOG1367	3-phosphoglycerate kinase
TRINITY_DN316_c1_g1_m.6902	hypothetical protein	--	0.3636	0.00318395	Down	31.219	12.4	3	3	1.42892	1.54102	1.43014	0.655115	0.38088	0.563927	extracellular
TRINITY_DN334_c0_g1_m.7183	Guanine nucleotide-binding protein G(I)/G(S)/G(T) subunit beta-1 OS=Homarus americanus OX=6706 GN=GBETA1 PE=2 SV=1	GBETA1	1.6656	0.00129469	Up	37.43	20.6	6	6	0.675938	0.806764	0.768185	1.18514	1.22803	1.33594	cytoplasm	K04536	GNB1; guanine nucleotide-binding protein G(I)/G(S)/G(T) subunit beta-1	map04014 Ras signaling pathway; map04062 Chemokine signaling pathway; map04151 PI3K-Akt signaling pathway; map04371 Apelin signaling pathway; map04713 Circadian entrainment; map04723 Retrograde endocannabinoid signaling; map04724 Glutamatergic synapse; map04725 Cholinergic synapse; map04726 Serotonergic synapse; map04727 GABAergic synapse; map04728 Dopaminergic synapse; map04740 Olfactory transdu…	GO:0001667 ameboidal-type cell migration; GO:0002009 morphogenesis of an epithelium; GO:0003007 heart morphogenesis; GO:0003365 establishment of cell polarity involved in ameboidal cell migration; GO:0003371 establishment or maintenance of cytoskeleton polarity involved in ameboidal cell migration; GO:0003379 establishment of cell polarity involved in gastrulation cell migration; GO:0003380 estab…	GO:0005622 intracellular; GO:0005623 cell; GO:0005834 heterotrimeric G-protein complex; GO:0005886 plasma membrane; GO:0009898 cytoplasmic side of plasma membrane; GO:0016020 membrane; GO:0019897 extrinsic component of plasma membrane; GO:0019898 extrinsic component of membrane; GO:0031234 extrinsic component of cytoplasmic side of plasma membrane; GO:0032991 protein-containing complex; GO:007194…				S	KOG0286	G-protein beta subunit
TRINITY_DN37_c0_g1_m.7874	T-complex protein 1 subunit zeta OS=Oryctolagus cuniculus OX=9986 GN=CCT6 PE=1 SV=3	CCT6	0.5496	0.0178056	Down	41.321	22	6	6	1.18207	1.35416	1.33564	0.84572	0.512789	0.769623	extracellular							PF00722	Glycosyl hydrolases family 16
TRINITY_DN3715_c0_g1_m.7754	Arginine kinase OS=Eriocheir sinensis OX=95602 PE=2 SV=1	--	2.1531	0.00980798	Up	50.003	47.4	24	24	0.51695	0.642851	0.743078	1.28071	1.11043	1.70598	endoplasmic reticulum	K00934	E2.7.3.3; arginine kinase [EC:2.7.3.3]	map00330 Arginine and proline metabolism	GO:0006793 phosphorus metabolic process; GO:0006796 phosphate-containing compound metabolic process; GO:0008152 metabolic process; GO:0009987 cellular process; GO:0016310 phosphorylation; GO:0044237 cellular metabolic process;		GO:0003824 catalytic activity; GO:0004054 arginine kinase activity; GO:0016301 kinase activity; GO:0016740 transferase activity; GO:0016772 transferase activity, transferring phosphorus-containing groups; GO:0016775 phosphotransferase activity, nitrogenous group as acceptor; GO:0019202 amino acid kinase activity;	PF02807; PF00217	ATP:guanido phosphotransferase, N-terminal domain; ATP:guanido phosphotransferase, C-terminal catalytic domain	C	KOG3581	Creatine kinases
TRINITY_DN3897_c0_g1_m.7995	Tubulin alpha-1 chain OS=Homarus americanus OX=6706 PE=2 SV=1	--	1.6799	4.42996e-05	Up	36.419	40.9	9	2	0.741036	0.722211	0.775678	1.21054	1.27368	1.27686	cytoplasm	K07374	TUBA; tubulin alpha	map04145 Phagosome; map04210 Apoptosis; map04530 Tight junction; map04540 Gap junction; map05130 Pathogenic Escherichia coli infection				PF00091; PF03953	Tubulin/FtsZ family, GTPase domain; Tubulin C-terminal domain	Z	KOG1376	Alpha tubulin
TRINITY_DN397_c0_g1_m.8108	Upstream activation factor subunit spp27 OS=Schizosaccharomyces pombe (strain 972 / ATCC 24843) OX=284812 GN=spp27 PE=1 SV=1	spp27	0.386	0.0448701	Down	26.943	15.8	4	4	1.40602	0.882671	1.6879		0.424851	0.598557	nucleus	K15223	UAF30, SPP27; upstream activation factor subunit UAF30		GO:0000226 microtubule cytoskeleton organization; GO:0000278 mitotic cell cycle; GO:0000280 nuclear division; GO:0006996 organelle organization; GO:0007010 cytoskeleton organization; GO:0007017 microtubule-based process; GO:0007049 cell cycle; GO:0007051 spindle organization; GO:0007052 mitotic spindle organization; GO:0009987 cellular process; GO:0016043 cellular component organization; GO:00224…	GO:0005622 intracellular; GO:0005623 cell; GO:0005634 nucleus; GO:0005730 nucleolus; GO:0031974 membrane-enclosed lumen; GO:0031981 nuclear lumen; GO:0043226 organelle; GO:0043227 membrane-bounded organelle; GO:0043228 non-membrane-bounded organelle; GO:0043229 intracellular organelle; GO:0043231 intracellular membrane-bounded organelle; GO:0043232 intracellular non-membrane-bounded organelle; GO…		PF08766; PF02201	DEK C terminal domain; SWIB/MDM2 domain	K	KOG1946	RNA polymerase I transcription factor UAF
TRINITY_DN418_c1_g1_m.8384	CLIP domain-containing serine protease 2 OS=Bombyx mori OX=7091 PE=1 SV=1	--	2.4207	0.0113474	Up	45.82	23.6	7	7	0.537927	0.731022	0.485066	1.61695	1.01587	1.61316	extracellular	K09640	TMPRSS9; transmembrane protease serine 9 [EC:3.4.21.-]		GO:0002225 positive regulation of antimicrobial peptide production; GO:0002376 immune system process; GO:0002682 regulation of immune system process; GO:0002684 positive regulation of immune system process; GO:0002697 regulation of immune effector process; GO:0002699 positive regulation of immune effector process; GO:0002700 regulation of production of molecular mediator of immune response; GO:00…	GO:0005576 extracellular region;	GO:0003824 catalytic activity; GO:0004175 endopeptidase activity; GO:0004252 serine-type endopeptidase activity; GO:0005488 binding; GO:0005509 calcium ion binding; GO:0008233 peptidase activity; GO:0008236 serine-type peptidase activity; GO:0016787 hydrolase activity; GO:0017171 serine hydrolase activity; GO:0043167 ion binding; GO:0043169 cation binding; GO:0046872 metal ion binding; GO:0070011…	PF12032; PF00089	Regulatory CLIP domain of proteinases; Trypsin	O	KOG3627	Trypsin
TRINITY_DN4500_c0_g1_m.8742	Putative helicase mov-10-B.1 OS=Danio rerio OX=7955 GN=mov10b.1 PE=2 SV=2	mov10b.1	1.603	0.0195813	Up	103.47	8	5	5	0.789449		0.679217	1.12076	1.33601	1.07457	cytoplasm	K18422	MOV10; helicase MOV-10 [EC:3.6.4.13]		GO:0000902 cell morphogenesis; GO:0000904 cell morphogenesis involved in differentiation; GO:0002682 regulation of immune system process; GO:0006139 nucleobase-containing compound metabolic process; GO:0006379 mRNA cleavage; GO:0006725 cellular aromatic compound metabolic process; GO:0006807 nitrogen compound metabolic process; GO:0007154 cell communication; GO:0007165 signal transduction; GO:000…	GO:0000932 P-body; GO:0005622 intracellular; GO:0005623 cell; GO:0005737 cytoplasm; GO:0005829 cytosol; GO:0032991 protein-containing complex; GO:0035770 ribonucleoprotein granule; GO:0036464 cytoplasmic ribonucleoprotein granule; GO:0043226 organelle; GO:0043228 non-membrane-bounded organelle; GO:0043229 intracellular organelle; GO:0043232 intracellular non-membrane-bounded organelle; GO:1990904…		PF13086; PF13087	AAA domain; AAA domain	L	KOG1804	RNA helicase
TRINITY_DN559_c0_g3_m.9998	Hemocyte protein-glutamine gamma-glutamyltransferase OS=Tachypleus tridentatus OX=6853 PE=1 SV=1	--	0.6299	0.0294947	Down	85.267	71.2	46	46	1.21811	1.31008	1.15304	0.854036	0.574265	0.890467	cytoplasm	K05619	TGM1; transglutaminase 1 [EC:2.3.2.13]					PF00868; PF00927	Transglutaminase family; Transglutaminase family, C-terminal ig like domain
TRINITY_DN5628_c0_g3_m.10049	Protocadherin Fat 3 OS=Homo sapiens OX=9606 GN=FAT3 PE=2 SV=3	FAT3	0.4113	0.00046475	Down	150.82	63.3	56	56	1.32473	1.6419	1.28469	0.557611	0.569201	0.621873	extracellular							PF00008	EGF-like domain
TRINITY_DN6_c0_g1_m.11373	Peflin OS=Homo sapiens OX=9606 GN=PEF1 PE=1 SV=1	PEF1	0.5596	0.0343559	Down	27.649	24.5	4	4	1.62824	0.946695	1.27215	0.681669	0.84059	0.630656	extracellular							PF13499	EF-hand domain pair	T	KOG0037	Ca2+-binding protein, EF-Hand protein superfamily
TRINITY_DN600_c0_g1_m.10539	protein spaetzle 5-like isoform X2 [Penaeus vannamei]	--	3.3422	0.00909833	Up	29.781	49.6	11	11	0.54309	0.384594	0.454118	2.1649	1.46202	0.991277	extracellular	K20694	SPZ; protein spaetzle	map04624 Toll and Imd signaling pathway	GO:0000003 reproduction; GO:0000578 embryonic axis specification; GO:0000902 cell morphogenesis; GO:0000904 cell morphogenesis involved in differentiation; GO:0002164 larval development; GO:0002225 positive regulation of antimicrobial peptide production; GO:0002376 immune system process; GO:0002682 regulation of immune system process; GO:0002684 positive regulation of immune system process; GO:00…	GO:0005576 extracellular region; GO:0032991 protein-containing complex;	GO:0005102 signaling receptor binding; GO:0005121 Toll binding; GO:0005125 cytokine activity; GO:0005488 binding; GO:0005515 protein binding; GO:0008083 growth factor activity; GO:0016015 morphogen activity; GO:0030545 receptor regulator activity; GO:0042802 identical protein binding; GO:0042803 protein homodimerization activity; GO:0046983 protein dimerization activity; GO:0048018 receptor ligan…
TRINITY_DN689_c3_g1_m.11314	Ras suppressor protein 1 OS=Homo sapiens OX=9606 GN=RSU1 PE=1 SV=3	RSU1	0.5737	0.0088662	Down	33.385	17.3	4	4	1.15863	1.10947	1.54453	0.677823	0.710489	0.799049	cytoplasm				GO:0001932 regulation of protein phosphorylation; GO:0001933 negative regulation of protein phosphorylation; GO:0002009 morphogenesis of an epithelium; GO:0002165 instar larval or pupal development; GO:0006469 negative regulation of protein kinase activity; GO:0007154 cell communication; GO:0007165 signal transduction; GO:0007166 cell surface receptor signaling pathway; GO:0007229 integrin-mediat…					T	KOG0617	Ras suppressor protein (contains leucine-rich repeats)
TRINITY_DN796_c0_g1_m.12084	Protein singed OS=Drosophila melanogaster OX=7227 GN=sn PE=1 SV=1	sn	0.6358	0.00168493	Down	56.99	35.2	14	14	1.21929	1.18381	1.2649	0.758424	0.709852	0.863725	cytoplasm	K23551	FSCN1; fascin 1	map05206 MicroRNAs in cancer	GO:0000902 cell morphogenesis; GO:0002009 morphogenesis of an epithelium; GO:0002165 instar larval or pupal development; GO:0002376 immune system process; GO:0002520 immune system development; GO:0003002 regionalization; GO:0006928 movement of cell or subcellular component; GO:0006950 response to stress; GO:0006996 organelle organization; GO:0007010 cytoskeleton organization; GO:0007015 actin fil…	GO:0005622 intracellular; GO:0005623 cell; GO:0005737 cytoplasm; GO:0005856 cytoskeleton; GO:0015629 actin cytoskeleton; GO:0036477 somatodendritic compartment; GO:0042995 cell projection; GO:0043005 neuron projection; GO:0043025 neuronal cell body; GO:0043226 organelle; GO:0043228 non-membrane-bounded organelle; GO:0043229 intracellular organelle; GO:0043232 intracellular non-membrane-bounded or…	GO:0003779 actin binding; GO:0005488 binding; GO:0005515 protein binding; GO:0008092 cytoskeletal protein binding; GO:0044877 protein-containing complex binding; GO:0051015 actin filament binding;	PF06268	Fascin domain
TRINITY_DN797_c0_g1_m.12102	hypothetical protein	--	84.7082	0.00187299	Up	23.97	49.6	8	8	0.007975	0.054695	0.007335	2.33163	1.51238	2.08599	extracellular
TRINITY_DN799_c0_g1_m.12110	Leukocyte elastase inhibitor OS=Xenopus laevis OX=8355 GN=serpinb1 PE=2 SV=1	serpinb1	4.9718	0.00607777	Up	49.874	14	5	5	0.257528	0.333646		1.86506	1.47019	1.07357	extracellular	K23425	SERPINB1; leukocyte elastase inhibitor		GO:0002009 morphogenesis of an epithelium; GO:0002165 instar larval or pupal development; GO:0007275 multicellular organism development; GO:0007444 imaginal disc development; GO:0007472 wing disc morphogenesis; GO:0007476 imaginal disc-derived wing morphogenesis; GO:0007552 metamorphosis; GO:0007560 imaginal disc morphogenesis; GO:0008592 regulation of Toll signaling pathway; GO:0009605 response …	GO:0005576 extracellular region; GO:0005615 extracellular space;	GO:0004857 enzyme inhibitor activity; GO:0004866 endopeptidase inhibitor activity; GO:0004867 serine-type endopeptidase inhibitor activity; GO:0030234 enzyme regulator activity; GO:0030414 peptidase inhibitor activity; GO:0061134 peptidase regulator activity; GO:0061135 endopeptidase regulator activity; GO:0098772 molecular function regulator;	PF00079	Serpin (serine protease inhibitor)	V	KOG2392	Serpin
TRINITY_DN8507_c0_g2_m.12453	Tubulin alpha-2/alpha-4 chain OS=Patella vulgata OX=6465 GN=TUB2 PE=2 SV=1	TUB2	1.7535	0.0458972	Up	18.149	21.6	3	1	0.745008	0.780251	0.653773	1.33806	0.877445	1.60546	extracellular	K07374	TUBA; tubulin alpha	map04145 Phagosome; map04210 Apoptosis; map04530 Tight junction; map04540 Gap junction; map05130 Pathogenic Escherichia coli infection				PF00091	Tubulin/FtsZ family, GTPase domain	Z	KOG1376	Alpha tubulin
TRINITY_DN925_c0_g2_m.12943	Catalase OS=Bos taurus OX=9913 GN=CAT PE=1 SV=3	CAT	2.4116	0.0111104	Up	58.766	29.5	11	11	0.556904	0.700904	0.500909	1.12154	1.90725	1.21249	cytoplasm	K03781	katE, CAT, catB, srpA; catalase [EC:1.11.1.6]	map00380 Tryptophan metabolism; map00630 Glyoxylate and dicarboxylate metabolism; map01100 Metabolic pathways; map01200 Carbon metabolism; map04068 FoxO signaling pathway; map04146 Peroxisome; map04211 Longevity regulating pathway; map04212 Longevity regulating pathway - worm; map04213 Longevity regulating pathway - multiple species; map05014 Amyotrophic lateral sclerosis (ALS)				PF00199	Catalase	P	KOG0047	Catalase
TRINITY_DN926_c0_g1_m.12944	PREDICTED: neurogenic locus notch homolog protein 1-like [Hyalella azteca]	--	0.2663	0.00192832	Down	40.463	32.6	8	8	1.63472	1.24654	1.8571	0.439237	0.315172	0.507231	extracellular	K06825	FBN1; fibrillin 1	map04350 TGF-beta signaling pathway	GO:0002376 immune system process; GO:0006950 response to stress; GO:0006952 defense response; GO:0006955 immune response; GO:0006959 humoral immune response; GO:0007599 hemostasis; GO:0009611 response to wounding; GO:0032501 multicellular organismal process; GO:0042060 wound healing; GO:0042381 hemolymph coagulation; GO:0045087 innate immune response; GO:0050817 coagulation; GO:0050878 regulation…	GO:0005576 extracellular region;	GO:0005488 binding; GO:0005515 protein binding; GO:0042802 identical protein binding; GO:0042803 protein homodimerization activity; GO:0046983 protein dimerization activity;			T	KOG1216	von Willebrand factor and related coagulation proteins
TRINITY_DN94_c0_g1_m.13106	hypothetical protein	--	0.293	0.0257163	Down	12.566	21.3	2	2	0.850924	2.01567	1.77385	0.34898	0.336223	0.674359	nucleus
TRINITY_DN941_c0_g1_m.13028	Hemolymph clottable protein OS=Penaeus monodon OX=6687 PE=1 SV=1	--	0.2775	0.00362646	Down	192.83	74.1	121	121	1.4013	1.55865	1.7366	0.615922	0.304805	0.382723	nucleus					GO:0005576 extracellular region;				P	KOG4338	Predicted lipoprotein
TRINITY_DN99_c1_g1_m.13330	Glutamate dehydrogenase, mitochondrial OS=Drosophila melanogaster OX=7227 GN=Gdh PE=1 SV=2	Gdh	3.0605	0.000395627	Up	64.322	30.5	15	15	0.562084	0.484799	0.430783	1.45153	1.70841	1.3624	mitochondria	K00261	GLUD1_2, gdhA; glutamate dehydrogenase (NAD(P)+) [EC:1.4.1.3]	map00220 Arginine biosynthesis; map00250 Alanine, aspartate and glutamate metabolism; map00471 D-Glutamine and D-glutamate metabolism; map00910 Nitrogen metabolism; map01100 Metabolic pathways; map01200 Carbon metabolism; map04217 Necroptosis; map04964 Proximal tubule bicarbonate reclamation	GO:0006082 organic acid metabolic process; GO:0006103 2-oxoglutarate metabolic process; GO:0006106 fumarate metabolic process; GO:0006116 NADH oxidation; GO:0006139 nucleobase-containing compound metabolic process; GO:0006520 cellular amino acid metabolic process; GO:0006536 glutamate metabolic process; GO:0006538 glutamate catabolic process; GO:0006725 cellular aromatic compound metabolic proces…	GO:0005622 intracellular; GO:0005623 cell; GO:0005737 cytoplasm; GO:0005739 mitochondrion; GO:0005759 mitochondrial matrix; GO:0031974 membrane-enclosed lumen; GO:0043226 organelle; GO:0043227 membrane-bounded organelle; GO:0043229 intracellular organelle; GO:0043231 intracellular membrane-bounded organelle; GO:0043233 organelle lumen; GO:0070013 intracellular organelle lumen;	GO:0003824 catalytic activity; GO:0004352 glutamate dehydrogenase (NAD+) activity; GO:0004353 glutamate dehydrogenase [NAD(P)+] activity; GO:0005488 binding; GO:0005515 protein binding; GO:0016491 oxidoreductase activity; GO:0016638 oxidoreductase activity, acting on the CH-NH2 group of donors; GO:0016639 oxidoreductase activity, acting on the CH-NH2 group of donors, NAD or NADP as acceptor; GO:0…	PF02812; PF00208	Glu/Leu/Phe/Val dehydrogenase, dimerisation domain; Glutamate/Leucine/Phenylalanine/Valine dehydrogenase	E	KOG2250	Glutamate/leucine/phenylalanine/valine dehydrogenases
TRINITY_DN9938_c0_g1_m.13298	Nucleobindin-2 OS=Homo sapiens OX=9606 GN=NUCB2 PE=1 SV=3	NUCB2	4.1372	0.000205354	Up	71.367	13.6	7	7	0.361256	0.40078	0.40591	1.92177	1.34979	1.56049	extracellular	K20371	NUCB; nucleobindin		GO:0006950 response to stress; GO:0006952 defense response; GO:0009605 response to external stimulus; GO:0009607 response to biotic stimulus; GO:0009617 response to bacterium; GO:0042742 defense response to bacterium; GO:0043207 response to external biotic stimulus; GO:0050829 defense response to Gram-negative bacterium; GO:0050896 response to stimulus; GO:0051704 multi-organism process; GO:00517…	GO:0005622 intracellular; GO:0005623 cell; GO:0005737 cytoplasm; GO:0005794 Golgi apparatus; GO:0012505 endomembrane system; GO:0043226 organelle; GO:0043227 membrane-bounded organelle; GO:0043229 intracellular organelle; GO:0043231 intracellular membrane-bounded organelle;		PF13499	EF-hand domain pair	S	KOG3866	DNA-binding protein of the nucleobindin family
